# Supplementary material for: The potential value of ultrasound in predicting local refractory/relapse events in primary thyroid lymphoma patients
Source: Springer Nature journal article supplement (doi:10.1186/s40644-024-00681-z), 2024-03-20
Supplement: MOESM1 [file 40644_2024_681_MOESM1_ESM.pdf]

This document certifies that the manuscript

## **The potential value of ultrasound in predicting local refractory/relapse events for primary thyroid lymphoma patients**

prepared by the authors

**Jiang Ji\*, Luying Gao\*, Ruifeng Liu, Xinlong Shi, Liyuan Ma, Aonan Pan, Naishi Li, Chunhao Liu, Xiaoyi Li, Meng Yang, Yu Xia&, Yuxin Jiang&**

was edited for proper English language, grammar, punctuation, spelling, and overall style by one or more of the highly qualified native English speaking editors at AJE.

This certificate was issued on **October 10, 2023** and may be verified on the [AJE website](https://aje.com) using the verification code **CB2A-BF99-53FB-E185-A7BA**.

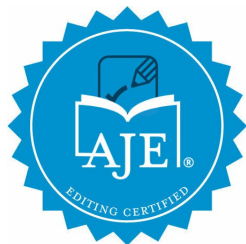

Neither the research content nor the authors' intentions were altered in any way during the editing process. Documents receiving this certification should be English-ready for publication; however, the author has the ability to accept or reject our suggestions and changes. To verify the final AJE edited version, please visit our verification page at [aje.com/certificate](https://aje.com/certificate). If you have any questions or concerns about this edited document, please contact AJE at [support@aje.com](mailto:support@aje.com).
